# Supplementary material for: NrtR Mediated Regulation of H1-T6SS in Pseudomonas aeruginosa
Source: PubMed Central journal article supplement (PMC8865458; doi:10.1128/spectrum.01858-21), 2022-02-23
Supplement: spectrum01858-21_supp_1_seq12.pdf [file spectrum01858-21_supp_1_seq12.pdf]

Fig. S1

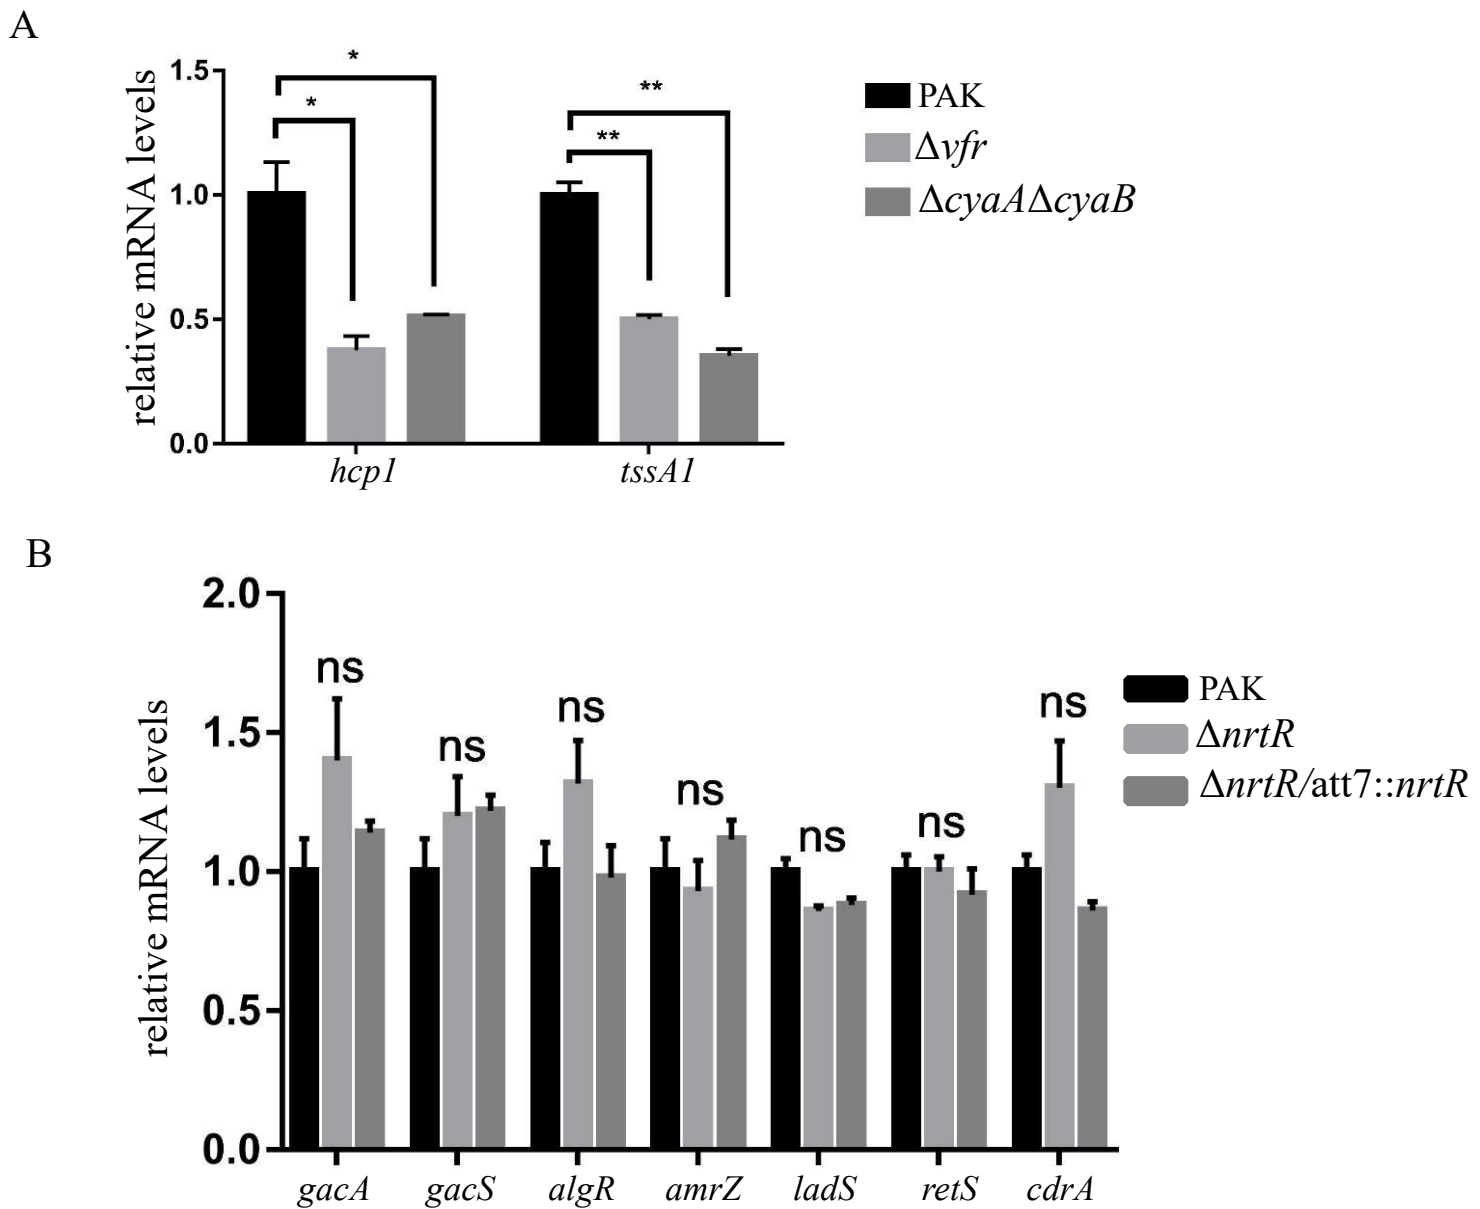

**Fig. S1.** The relative mRNA levels of the indicated genes in PAK,  $\Delta nrtR$ ,  $\Delta nrtR/att7::nrtR$ ,  $\Delta cyaA\Delta cyaB$  or  $\Delta yfr$ . Total RNA was isolated from bacteria at an  $OD_{600}$  of 1.0, and the mRNA levels were examined by real-time qPCR using *rpsL* as an internal control. ns, not significant, \*,  $P < 0.05$ , \*\*,  $P < 0.01$ , compared to PAK by Student's *t* test.

Fig. S2

A

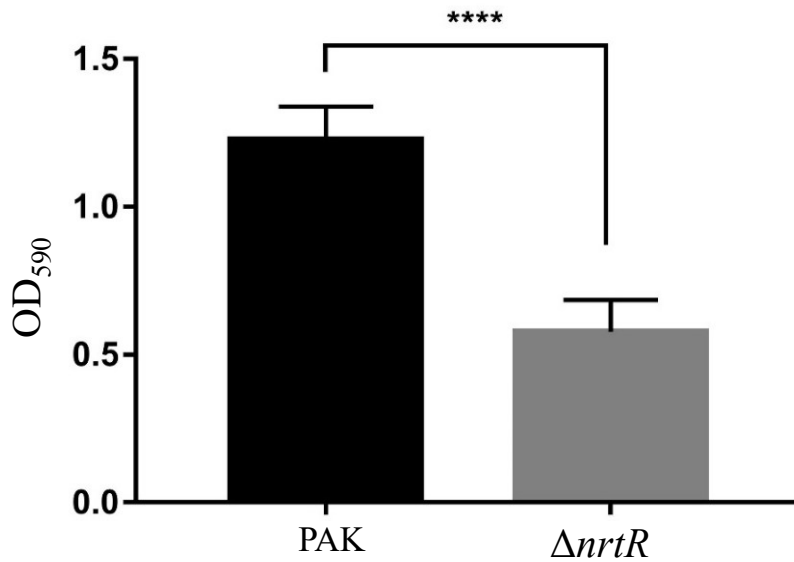

B

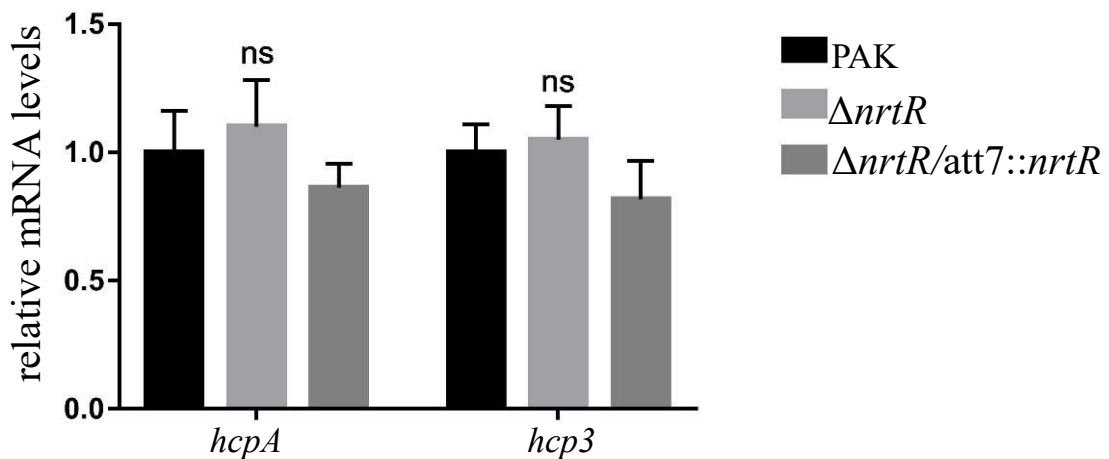

**Fig. S2. (A)** Biofilm formation by the PAK and  $\Delta nrtR$  strains. PAK and  $\Delta nrtR$  were grown in a 96-well plate for 24 h. The wells were washed with H<sub>2</sub>O and stained with 2.5% crystal violet. The crystal violet was dissolved in destaining solution and measured at a wavelength of 590 nm. \*\*\*\*,  $P < 0.0001$ , compared to PAK by Student's *t* test. **(B)** The relative mRNA levels of the indicated genes in PAK,  $\Delta nrtR$ , and  $\Delta nrtR/att7::nrtR$ . Total RNA was isolated from bacteria at an OD<sub>600</sub> of 1.0, and the mRNA levels were examined by real-time qPCR using *rpsL* as an internal control. ns, not significant compared to PAK by Student's *t* test.

**Table S1.** Bacterial strains and plasmids used in this study.

| Strain or plasmid                                              | Description                                                                                                                                                                                           | Source or reference |
|----------------------------------------------------------------|-------------------------------------------------------------------------------------------------------------------------------------------------------------------------------------------------------|---------------------|
| <b>strains</b>                                                 |                                                                                                                                                                                                       |                     |
| <i>E. coli</i> strains                                         |                                                                                                                                                                                                       |                     |
| DH5 $\alpha$                                                   | F $\phi$ 80 <i>lacZ</i> $\Delta$ M15 <i>endA1 recA1</i><br><i>hsdR17</i> (r $\bar{k}$ m $\bar{k}$ <sup>+</sup> ) <i>supE44 thi-1 relA1</i><br>$\Delta$ ( <i>lacZYA-argF</i> ) U169 <i>gyrA96 deoR</i> | TransGen            |
| S17-1                                                          | RP4-2 Tc <sup>r</sup> ::Mu Km <sup>r</sup> ::Tn7 Tp <sup>r</sup> Sm <sup>r</sup> Pro Re <sup>s</sup><br>Mod <sup>+</sup>                                                                              | Dr. Ramphal         |
| BL21(DE3)                                                      | F <sup>-</sup> <i>ompT hsdSB</i> ( <i>rB</i> , <i>mB</i> ) <i>gal dcm</i> (DE3)                                                                                                                       | invitrogen          |
| <b><i>P. aeruginosa</i> strains</b>                            |                                                                                                                                                                                                       |                     |
| PAK                                                            | Wild type <i>P. aeruginosa</i> strain                                                                                                                                                                 | (1)                 |
| $\Delta$ <i>nrtR</i>                                           | PAK with <i>nrtR</i> deleted                                                                                                                                                                          | (1)                 |
| $\Delta$ <i>nrtR</i> /att7:: <i>hcp1-flag</i>                  | P <sub><i>hcp1-hcp1</i></sub> -Flag integrated into the<br>chromosome of $\Delta$ <i>nrtR</i> with mini-Tn7                                                                                           | This study          |
| PAK/att7:: <i>hcp1-flag</i>                                    | P <sub><i>hcp1-hcp1</i></sub> -Flag integrated into chromosome<br>of PAK with mini-Tn7                                                                                                                | This study          |
| $\Delta$ <i>nrtR</i> /att7:: <i>nrtR</i>                       | $\Delta$ <i>nrtR</i> with <i>nrtR</i> inserted into the<br>chromosome with mini-Tn7 insertion                                                                                                         | (1)                 |
| $\Delta$ <i>rsmY</i> $\Delta$ <i>rsmZ</i>                      | PAK with <i>rsmY</i> and <i>rsmZ</i> gene deleted                                                                                                                                                     | (2)                 |
| $\Delta$ <i>nrtR</i> $\Delta$ <i>rsmY</i> $\Delta$ <i>rsmZ</i> | $\Delta$ <i>nrtR</i> with <i>rsmY</i> and <i>rsmZ</i> gene deleted                                                                                                                                    | This study          |
| $\Delta$ <i>yfr</i>                                            | PAK with <i>yfr</i> gene deleted                                                                                                                                                                      | (1)                 |
| $\Delta$ <i>cyaA</i> $\Delta$ <i>cyaB</i>                      | PAK with <i>cyaA</i> and <i>cyaB</i> gene deleted                                                                                                                                                     | (1)                 |
| <b>Plasmids</b>                                                |                                                                                                                                                                                                       |                     |
| pUCP20                                                         | Shuttle vector between <i>E. coli</i> and <i>P. aeruginosa</i> ; Amp <sup>r</sup>                                                                                                                     | (3)                 |
| pUCP24                                                         | Shuttle vector between <i>E. coli</i> and <i>P. aeruginosa</i> ; Gm <sup>r</sup>                                                                                                                      | (3)                 |
| pTNS3                                                          | Helper plasmid encoding Tn7 site-specific<br>transposition pathway; Amp <sup>r</sup>                                                                                                                  | (4)                 |
| pET28a                                                         | Expression vector, Kan <sup>r</sup>                                                                                                                                                                   | Novagen             |
| E1553- <i>hcp1-flag</i>                                        | <i>hcp1</i> with its promoter cloned into<br>promoterless pUCP20                                                                                                                                      | This study          |
| pUCP20- <i>rsmA</i>                                            | <i>rsmA</i> gene from PAK in pUCP20; Amp <sup>r</sup>                                                                                                                                                 | This study          |
| pUCP20- <i>rsmN</i>                                            | <i>rsmN</i> gene from PAK in pUCP20; Amp <sup>r</sup>                                                                                                                                                 | This study          |
| pUCP24- <i>nrtR</i>                                            | N terminal Flag-tagged <i>nrtR</i> from PAK in<br>pUCP24; Gm <sup>r</sup>                                                                                                                             | This study          |
| pEX18- <i>rsmY</i>                                             | <i>rsmY</i> gene deletion on pEX18Tc; Tc <sup>r</sup>                                                                                                                                                 | (2)                 |
| pEX18- <i>rsmZ</i>                                             | <i>rsmZ</i> gene deletion on pEX18Tc; Tc <sup>r</sup>                                                                                                                                                 | (2)                 |
| p19-EGFP                                                       | EGFP gene cloned into pDN19 <i>lacZ</i> $\Omega$ which<br>was cut with <i>Bam</i> HI- <i>Hind</i> III, Tc <sup>r</sup>                                                                                | This study          |
| P <sub><i>rsmY</i></sub> -EGFP                                 | <i>rsmY</i> promoter fused to P19-EGFP; Tc <sup>r</sup>                                                                                                                                               | This study          |
| P <sub><i>rsmZ</i></sub> -EGFP                                 | <i>rsmZ</i> promoter fused to P19-EGFP; Tc <sup>r</sup>                                                                                                                                               | This study          |
| P <sub><i>tssA1</i></sub> -EGFP                                | <i>tssA1</i> promoter fused to P19-EGFP; Tc <sup>r</sup>                                                                                                                                              | This study          |

|                                                                           |                                                                                                                                                           |                       |
|---------------------------------------------------------------------------|-----------------------------------------------------------------------------------------------------------------------------------------------------------|-----------------------|
| pUC18T-mini-Tn7T-<br>Gm- <i>hcp1</i> - <i>flag</i><br>pET28a- <i>nrtR</i> | Flag tagged <i>hcp1</i> on pUC18T-mini-Tn7T<br>driven by <i>hcp1</i> promoter; Gm <sup>r</sup><br><i>nrtR</i> of PAK cloned into pET28a, Kan <sup>r</sup> | (2)<br><br>This study |
|---------------------------------------------------------------------------|-----------------------------------------------------------------------------------------------------------------------------------------------------------|-----------------------|

1. Jin Y, Zhang M, Zhu F, Peng Q, Weng Y, Zhao Q, Liu C, Bai F, Cheng Z, Jin S, Wu W. 2019. NrtR Regulates the Type III Secretion System Through cAMP/Vfr Pathway in *Pseudomonas aeruginosa*. *Front Microbiol* 10:85.
2. Li K, Xu C, Jin Y, Sun Z, Liu C, Shi J, Chen G, Chen R, Jin S, Wu W. 2013. SuhB is a regulator of multiple virulence genes and essential for pathogenesis of *Pseudomonas aeruginosa*. *mBio* 4:e00419-13.
3. West SE, Schweizer HP, Dall C, Sample AK, Runyen-Janecky LJ. 1994. Construction of improved *Escherichia-Pseudomonas* shuttle vectors derived from pUC18/19 and sequence of the region required for their replication in *Pseudomonas aeruginosa*. *Gene* 148:81-6.
4. Choi KH, Schweizer HP. 2006. mini-Tn7 insertion in bacteria with single attTn7 sites: example *Pseudomonas aeruginosa*. *Nat Protoc* 1:153-61.

**Table S2.** Primers used in this study.

---

| Primer <sup>a</sup>        | Sequence 5'-3' <sup>b</sup>                                         |
|----------------------------|---------------------------------------------------------------------|
| pUCP- <i>rsmNF</i>         | <u>GGAATTCT</u> GACTGGCAAGGACGCGGAACATGG                            |
| pUCP- <i>rsmNR</i>         | CCCAAGCTTTTCAGTGGTGGTGGTGGTGGCCTTT<br>CGGTGCCGTTTTCAAC              |
| pUCP- <i>rsmAF</i>         | <u>GGAATTCTT</u> TCGCGTGAGGAGAAAGGAATGCTG                           |
| pUCP- <i>rsmAR</i>         | CCCAAGCTTTTTAGTGGTGGTGGTGGTGGTGGTGGTGGTGGT<br>TGGCTCTTGATCTTTCTC    |
| E1553- <i>hcp1-flagF</i>   | <u>GCTCTAGA</u> ACACCGACTTCGCCGCCTTCATCGG                           |
| E1553- <i>hcp1-flagR</i>   | CCCAAGCTTTTCACTTGTCGTCATCGTCCTTGTAGTC<br>GGCCTGCACGTTCTGGCGGATGTTCC |
| <i>nrtR-flagF</i>          | CGGGATCCGATTACAAGGACGACGATGACAAGAGT<br>TCAGCGGAAGTATTGGCC           |
| <i>nrtR-flagR</i>          | CCCAAGCTTTTCAGGACGCCAGCAGGCTGCG                                     |
| pET- <i>nrtRF</i>          | CCCATATGAGTTCAGCGGAAGTATTGGCC                                       |
| pET- <i>nrtRR</i>          | CCCTCGAGTCAGGACGCCAGCAGGCTG                                         |
| P <sub>Tn7R</sub>          | CACAGCATAACTGGACTGATTTC                                             |
| P <sub>glmS-down</sub>     | GCACATCGGCGACGTGCTCTC                                               |
| P <sub><i>rsmYF</i></sub>  | ATCGGTCTCGAATTCGGTGGCCACGTAGTTCCG                                   |
| P <sub><i>rsmYR</i></sub>  | ATCGGTCTCGGATCCGGTTTGAAGATTACGCATCTC                                |
| P <sub><i>rsmZF</i></sub>  | <u>GGAATTCC</u> GAGCTGCTGCAGGATGAC                                  |
| P <sub><i>rsmZR</i></sub>  | <u>CGGGATCC</u> CAGGAGT GATATTAGCGATTC                              |
| P <sub><i>tssAIF</i></sub> | <u>GGAATTCG</u> CTCCGGGTCCGGCAGGAC                                  |
| P <sub><i>tssAIR</i></sub> | <u>CGGGATCC</u> GGTGACGATCTCCCTATCATC                               |
| Deletion test primer       |                                                                     |
| <i>rsmYTF</i>              | CGGCGAGCGGA ACTATTACA                                               |
| <i>rsmYTR</i>              | TGCTGGAAGGCGTGGTCTGA                                                |
| <i>rsmZTF</i>              | AGCATCTGGAGCGCTGATAC                                                |
| <i>rsmZTR</i>              | GCCAAAACGCTCGGTGAAT                                                 |
| EMSA primer                |                                                                     |
| <i>tssAIF</i>              | TGCTACTCCTTGCAATTGCCAG                                              |

---

---

|                  |                           |
|------------------|---------------------------|
| <i>tssA</i> IR   | GGTGACGATCTCCCTATCATC     |
| <i>rsm</i> ZF    | CAGGAGTGATATTAGCGATTCCCAG |
| <i>rsm</i> ZR    | CGGAAAACCTTAGACCCACTGAAG  |
| <i>rsm</i> YF    | GCTGGGAAGGCTCGCGATGATGAG  |
| <i>rsm</i> YR    | CCGTATTGTCTTTGGCGCTTCCTGC |
| <i>nadD</i> 2F   | AGAAAATACCTTCCACTGCGAA    |
| <i>nadD</i> 2R   | GGAAGCCTCCGCTTGAC         |
| <i>nrt</i> RF    | TGTTGCTGATCCGCCGCGCCCAGGC |
| <i>nrt</i> RR    | CCGCGTTGCCGACCGTGGCCACCTG |
| <i>tssA</i> up   | GTTGCATGACACCGCAGATC      |
| <i>tssA</i> down | CCTTCCTTGACAAGCCTTGC      |
| qPCR primer      |                           |
| <i>hcp</i> IF    | AGGACCTGTCGTTACCAA        |
| <i>hcp</i> IR    | ATAGTGCTTGCCGCTGGA        |
| <i>gac</i> SF    | GAGGAAATGCAGCACAAC        |
| <i>gac</i> SR    | GTTCTGGATCTCGATGGT        |
| <i>gac</i> AF    | CCTGATGATCGCCA ACTG       |
| <i>gac</i> AR    | ATAGGTATTCACGGTCTTCG      |
| <i>alg</i> RF    | CCAGCAATGGCGAAGAAGC       |
| <i>alg</i> RR    | TCATGGGCCGTGCAGAAG        |
| <i>amr</i> ZF    | GGCGCTGCAAGACAATCT        |
| <i>amr</i> ZR    | GTTCTGCTGACGGTGGGT        |
| <i>rps</i> LF    | GTAAGGTATGCCGTGTACG       |
| <i>rps</i> LR    | CACTACGCTGTGCTCTTG        |
| <i>lad</i> SF    | ATCTACAACCTGTT CATCTT     |
| <i>lad</i> SR    | CCGAAGGAAGCGATATAG        |
| <i>ret</i> SF    | GATACTCGACATCTCAA         |
| <i>ret</i> SR    | GAAGATATCCAGGCAGTC        |
| <i>cdr</i> AF    | ATGTGAATCCGACTCTGA        |

---

---

|              |                      |
|--------------|----------------------|
| <i>cdrAR</i> | CGTTGAACTGACTGTTGA   |
| <i>hcpAF</i> | CAAGGTCGAGATCCAGTGGT |
| <i>hcpAR</i> | TCCAGGTGATCTTGCGGTAG |
| <i>hcp3F</i> | ATGGATGCGATCATTCTC   |
| <i>hcp3R</i> | GTTGTGGCTGTAGGACAT   |

---

a: F: forward; R, reverse; T: test; b: The underlines are the sites of restriction enzymes.

**Table S3.** Transcriptome analysis: differentially expressed genes via RNAseq without those listed in Table 1.

**Table S4.** Potential NrtR binding sites identified via ChIP-Seq analysis without those listed in Table 2.
